# Supplementary material
Source: Springer Nature journal article supplement (http://www.springermedizin.de/resource/supplementary/12876_2012_869_MOESM4_ESM.pdf/9437952)

## HCC +PBMCs co-culture

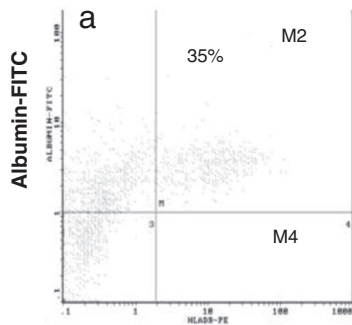

## HCC monoculture

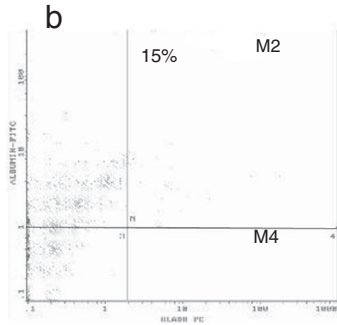

## HLA-DR-PE

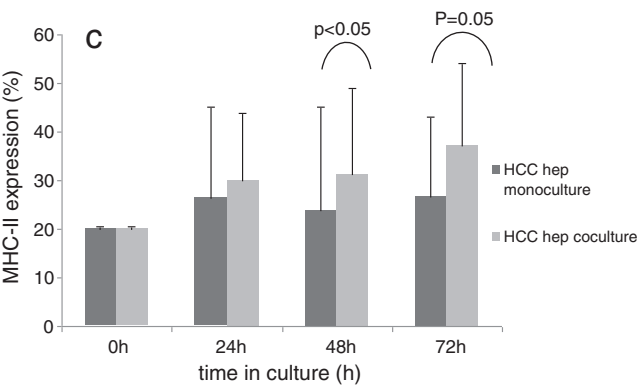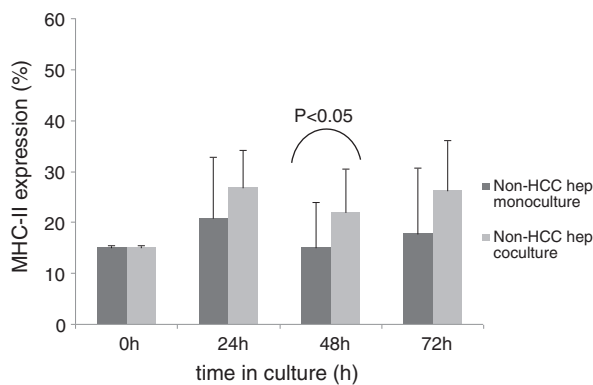

Supplement: MOESM4 [file 9437952]
